# Supplementary material for: Lineage-specific roles of the cytoplasmic polyadenylation factor CPEB4 in the regulation of melanoma drivers
Source: PubMed Central journal article supplement (PMC5120223; doi:10.1038/ncomms13418), 2016-11-18
Supplement: ncomms13418-s1.pdf [file ncomms13418-s1.pdf]

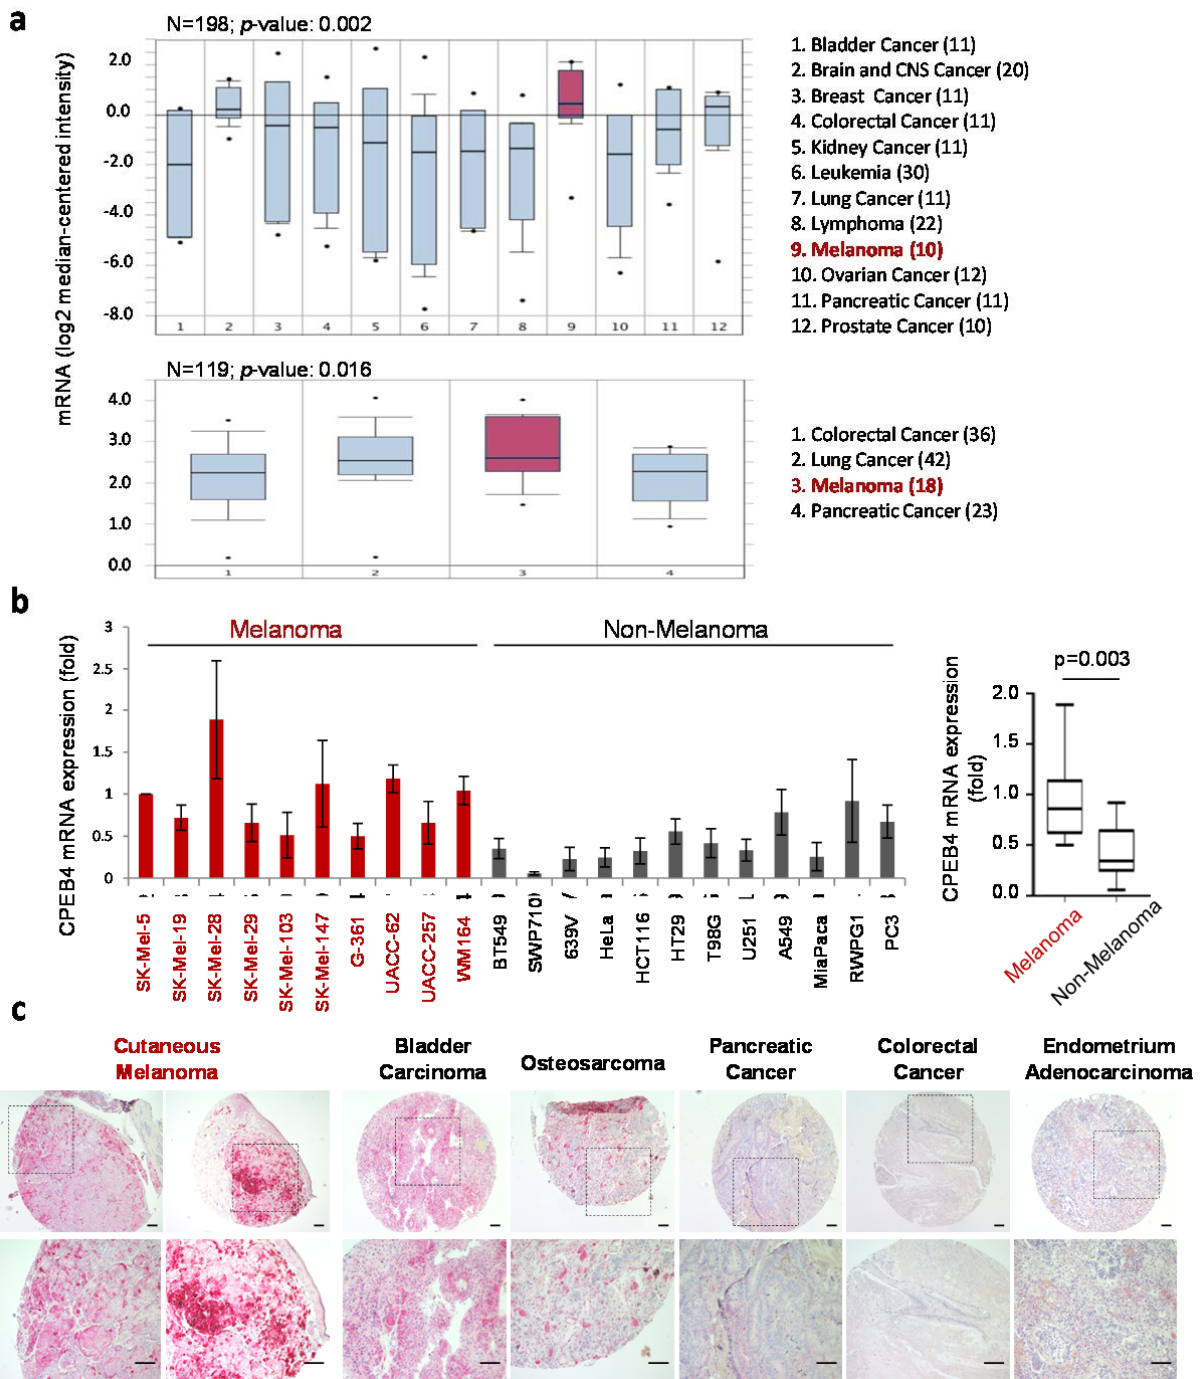

1  
2 **Supplementary Figure 1. CPEB4 expression in melanoma versus non-melanoma tumors. (a)**  
3 Relative *CPEB4* mRNA expression across the indicated cancer types as extracted by OncoPrint from  
4 Ramaswamy Multi-cancer<sup>1</sup> (upper panel; shown 170 out of the 198 cell lines of this dataset), and  
5 Wagner Cell Line set<sup>2</sup> (bottom panel; N=119). The number of cell lines from each tumor type is  
6 indicated in parenthesis. p values for melanoma-enriched CPEB4 are also indicated for each  
7 dataset. **(b)** *CPEB4* mRNA levels analyzed by RT-qPCR in the indicated melanoma (red) and non-  
8 melanoma (black) cell lines. Data is represented as means  $\pm$  SEMs of three experiments in  
9 triplicates. Aggregate levels for the melanoma vs. non melanoma cases analyzed are depicted in the  
10 right graph. p: Student's t-test p-value. **(c)** Representative examples of CPEB4 expression detected  
11 by immunohistochemistry in tissue microarrays (TMAs). Nuclei are counterstained with  
12 hematoxylin. The number of samples analyzed per tumor type is indicated in Supplementary  
13 Methods. Scale bars represent 50  $\mu$ m.

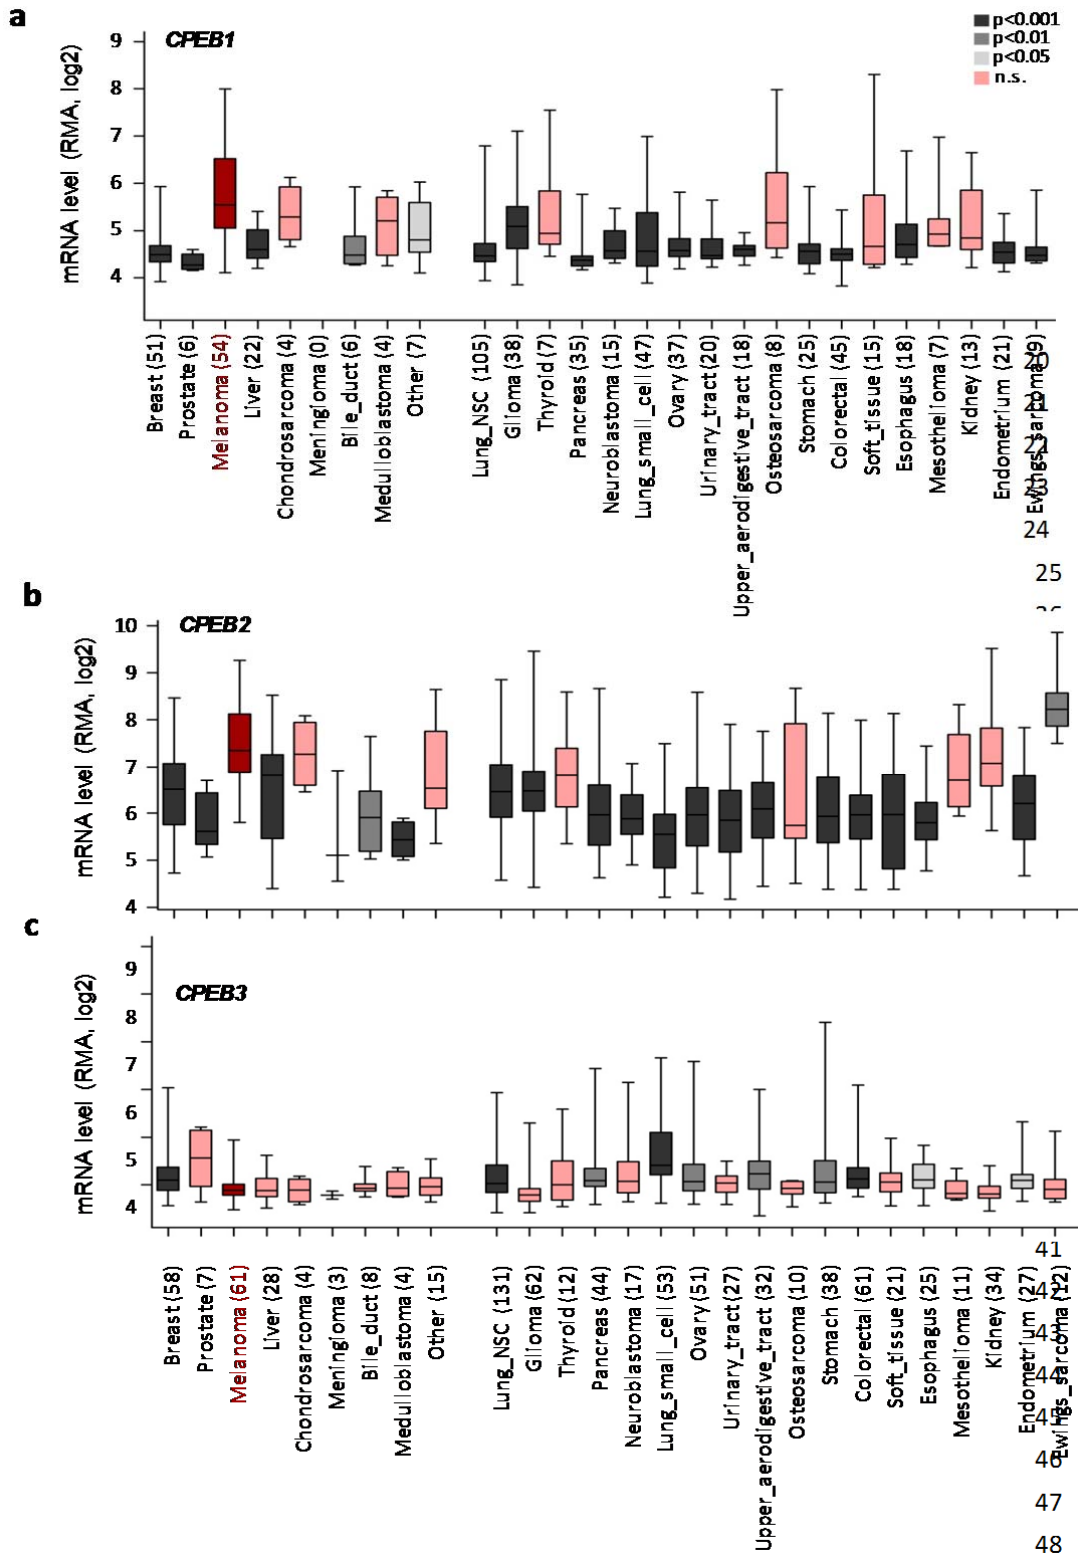

49

50 **Supplementary Figure 2. mRNA expression of CPEB1-3 in melanoma and non-melanoma tumor**  
 51 **cell lines from CCLE dataset. CPEB1 (a), CPEB2 (b) and CPEB3 (c)** mRNA expression in 27 solid tumor  
 52 types including melanoma extracted from the CCLE database (CCLE\_Expression\_Entrez\_2012-10-  
 53 18.res). The different tumors are listed following the relative expression of CPEB4 as defined in Fig.  
 54 1a. The number of cell lines from each cancer type is indicated in parenthesis. Box colors represent  
 55 the p-values from pairwise comparisons between melanoma and each of the indicated tumor types.  
 56

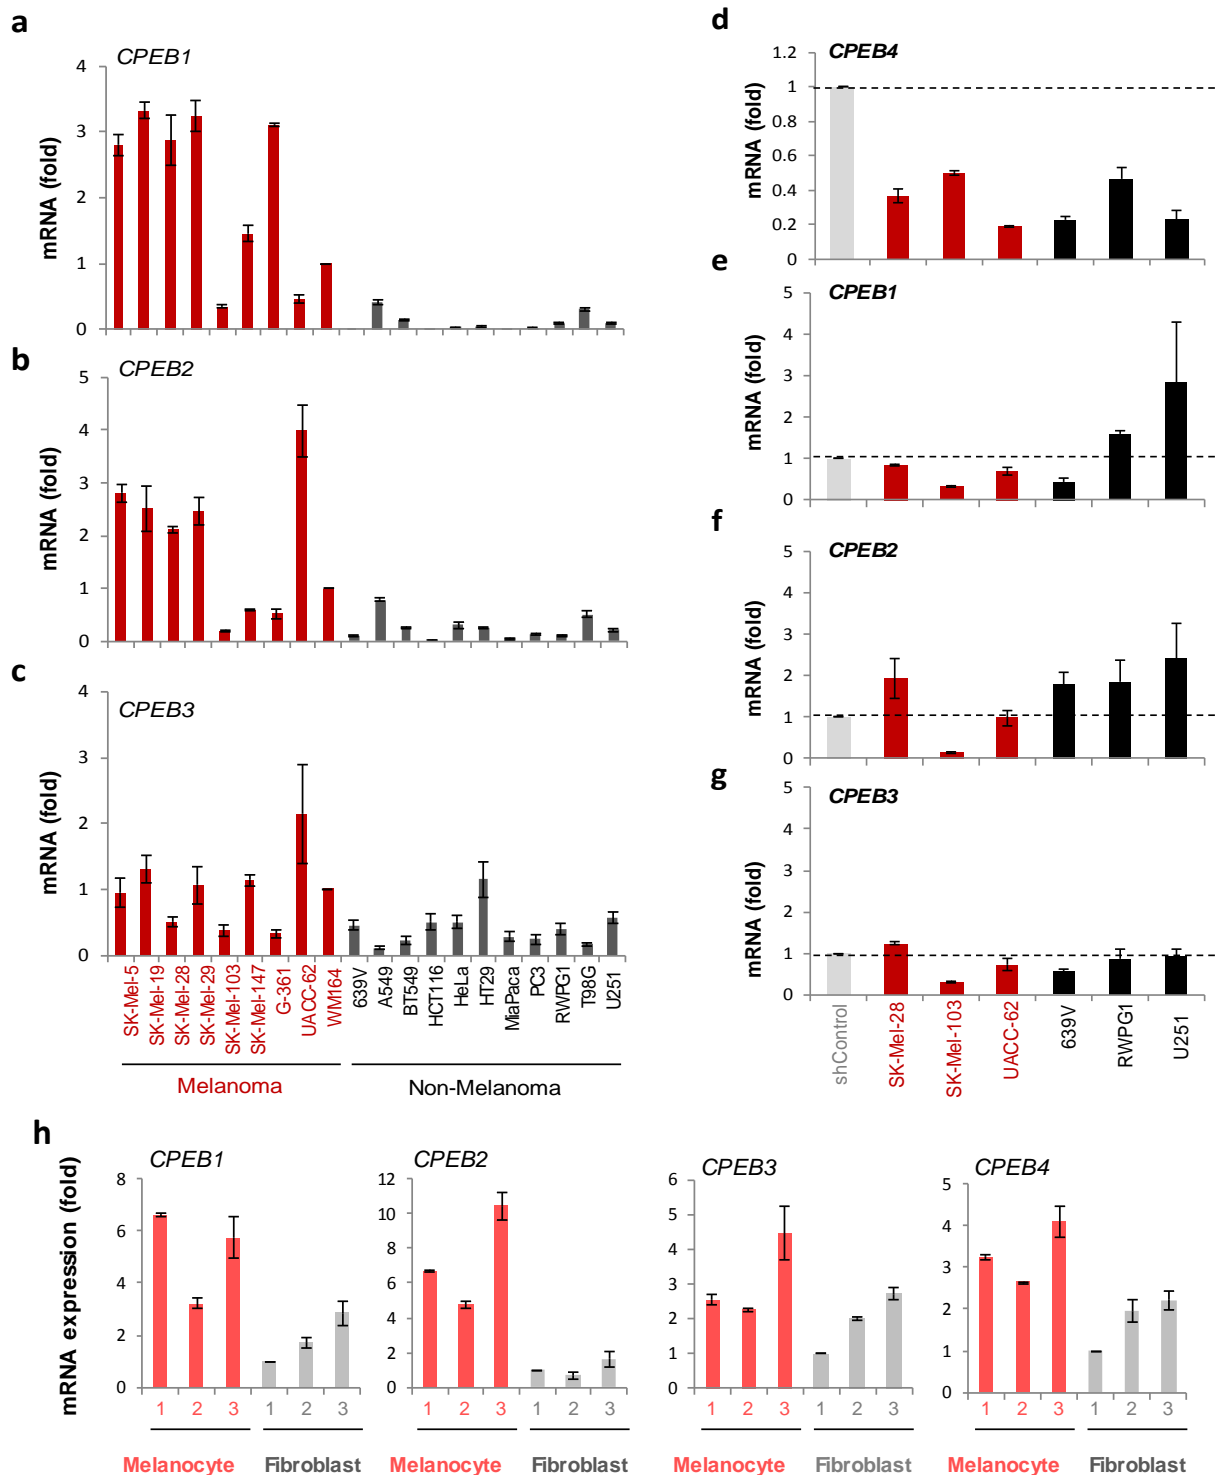

57

58

59 **Supplementary Figure 3. mRNA expression of CPEB family members in melanocytic and non-**  
 60 **melanocytic cells. (a-c)** mRNA expression of *CPEB1-3* determined by quantitative qRT-PCR in the  
 61 indicated melanoma and non-melanoma tumor cell lines. **(d)** *CPEB4* downregulation measured by  
 62 quantitative qRT-PCR upon transduction of *CPEB4* shRNA in the indicated cell lines. *CPEB4* mRNA  
 63 expression in shControl transduced cells is used as reference. Levels of *CPEB1*, *CPEB2* and *CPEB3*  
 64 mRNA in these *CPEB4*-depleted cells are depicted in panels **(e-g)**, respectively. **(h)** Relative mRNA  
 65 levels of *CPEB1-4* defined by qRT-PCR in primary melanocytes and genetically-matched primary  
 66 fibroblast. Data are shown as means  $\pm$  SEMs of two experiments in triplicate.

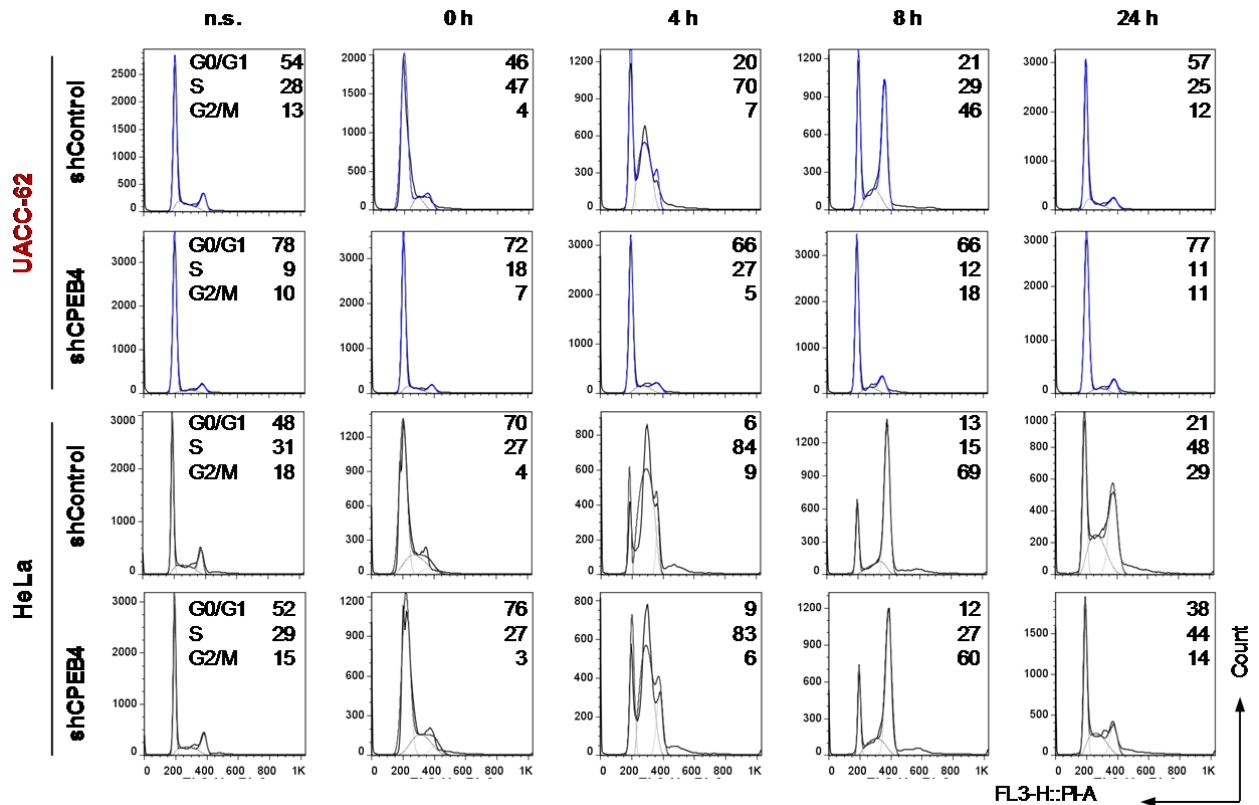

68

69

70

71 **Supplementary Figure 4. CPEB4 depletion compromises cell cycle proliferation in melanoma cells.**

72 Time-course analysis of the ability of the indicated cell populations to progress through the cell  
 73 cycle after release from thymidine block. The percentages of cells at the G0/G1, S or G2/M phases  
 74 were determined by propidium iodide (PI) staining and calculated using FlowJo software. n.s.: non-  
 75 synchronized.

76

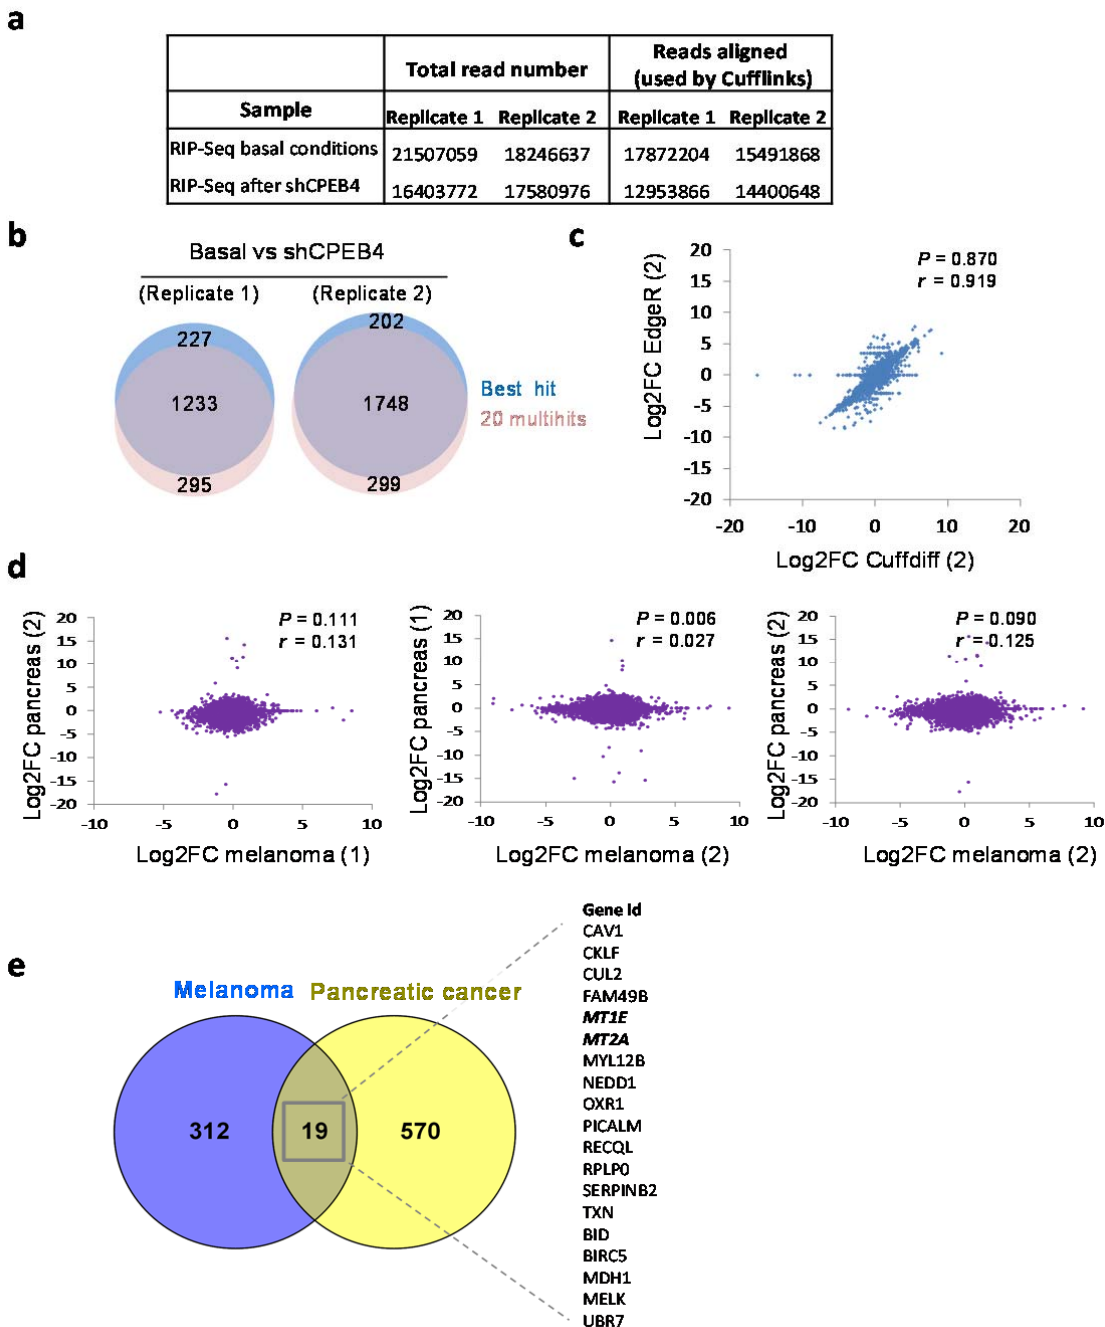

77 **Supplementary Figure 5. High correlation of RIP-seq data using different methodologies for**  
 78 **analysis. (a)** Total read counts obtained by Illumina sequencing and number of reads aligned by  
 79 TopHat-2.0.4 software and used for differential expression analysis by Cuffdiff from two RIP  
 80 experiments in SK-Mel-103 cells. **(b)** Venn diagrams comparing results obtained by TopHat-2.0.4  
 81 alignment using the best match score (best hit) or allowing for 20 multihits. Data are showed as the  
 82 number of immunoprecipitated transcripts found differentially expressed in control- versus shCPEB4-  
 83 transduced cells. **(c)** Correlation of fold change expression (Log2 scale, Log2FC) of  
 84 immunoprecipitated transcripts identified by Cuffdiff or EdgeR in an independent replicate of data in  
 85 Fig. 5a. **(d)** Comparison of CPEB4-bound mRNAs (Log2FC) in melanoma cells vs RWP-1 pancreatic  
 86 cancer cell line (the latter extracted from Ref<sup>3</sup>). Graphs show results for the indicated replicates of  
 87 each cell line. **(e)** Venn diagrams comparing CPEB4-bound mRNAs in SK-Mel-103 melanoma cells  
 88 with respect to previous reports for RWP1 pancreatic cells. Pearson coefficient (P) and Spearman  
 89 rank correlation coefficient (r) values are indicated in the corresponding panels.



**a**

**Pancreatic cancer\_GO terms**

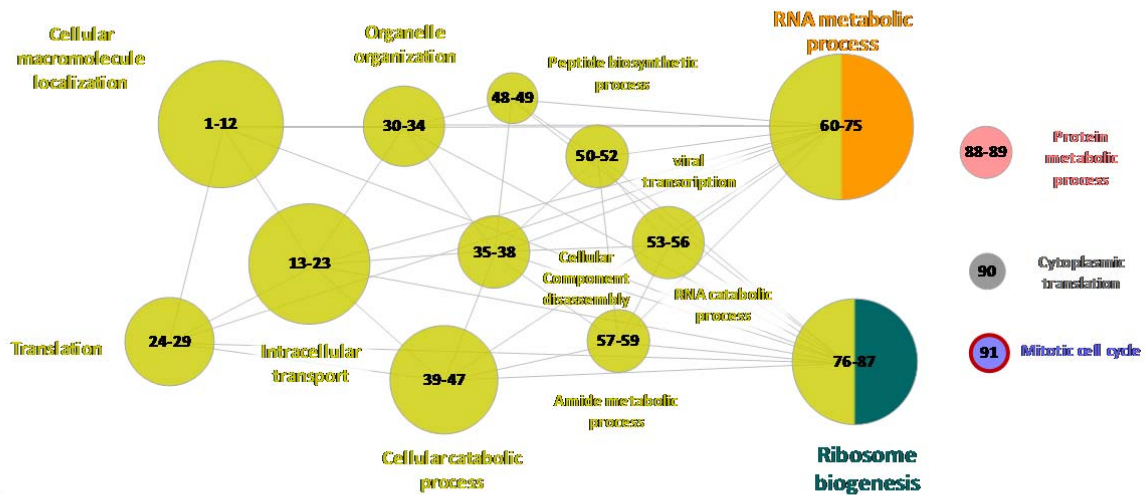

**b**

| IPA functional category (Melanoma)           | p-Value  | -Log (p-value) | # genes | Genes                                                                                                                                                                                                                                                                                                                                                                                                                                                                                                                                                    |
|----------------------------------------------|----------|----------------|---------|----------------------------------------------------------------------------------------------------------------------------------------------------------------------------------------------------------------------------------------------------------------------------------------------------------------------------------------------------------------------------------------------------------------------------------------------------------------------------------------------------------------------------------------------------------|
| Cell Cycle                                   | 2.75E-12 | 11.56          | 45      | ANLN,APP,ARNTL2,BUB1,BUB1B,CAV1,CD44,CDCA8,CDK1,CDK6,CENPE,CKAP2,CKS1B,CUL2,DYNLT3,EIF4G2,FBXO5,FKBP1A,FOSL1,GMNN,HHEX,HMGB1,KIF2A,MADZ1,MCM2,NCOA4,NEDD1,NPM1,NUF2,NUSAP1,OSBP1,PLAG1,PLK4,PRKAR2B,PTMA,PTPN2,RCC1,RELA,S1PR1,SKA3,TMPO,TP2A,TXN,VEGFA,ZWINT,RAI27A,DEK                                                                                                                                                                                                                                                                                 |
| Cellular Growth and Proliferation            | 9.75E-09 | 8.01           | 90      | AB12,AC11,APP,ARMC10,ARNTL2,ASPF,ATF2,BAG1,TG,BCAT1,BIRC3,BUB1,BUB1B,CAV1,CD44,CDCA2,CDCA7,CDCA7L,CDCA8,CDK1,CDK6,CKLF,CKS1B,OPF4,CTNND1,CTSB,CUL2,DIAPH1,DUSP5,EIF4G2,ETS2,ETV5,EXOC9,FBXO9,FKBP1A,FKBP5,FOSL1,FOXP1,FUS,GMNN,H2AFZ,HDGF,HHEX,HMGB1,HNRNPC,HNRNPFL,ILF3,LDHA,MADZ1,MANF,MBNL1,MCFD2,MCM2,MT1E,MT2A,MTF2,MYBL1,NCOA4,NEIL3,NPM1,NRP2,NT5C3A,ODCL1,PEX2,PLAG1,PLK4,PRKAR2B,PTMA,PTPN2,PTPN22,RAI27A,RECC1,RELA,RFC1,RNF7,S1PR1,SERPINB2,SET,SHMT2,SLC7A11,SLC7A5,SSX2IP,TIMP3,TIPIN,TMEM2,TMPO,TP2A,TXN,VEGFA,WHSC1,WWTR1                 |
| Cell Death and Survival                      | 2.15E-08 | 7.67           | 72      | AB12,ALDH1A3,AP15,APP,ARMC10,ATF2,ATG16L1,BIRC3,BUB1,CASP8AP2,CAV1,CBX5,CD44,CDCA2,CDK1,CDK6,CKAP2,CTSB,CUL2,DUT,EIF4G2,ETS2,ETV5,EXO1,FAM72A,FBX15,FBXO5,FKBP1A,FKBP5,FOXL1,FOXP1,FUS,GMNN,HDGF,HMGB1,HNRNPC,HSP61,ILF3,LDHA,MADZ1,MCM2,MME,MT1E,MT2A,MYBL1,NCOA4,NPM1,NUSAP1,ODCL1,OPAL,PCBP2,PHF17,PLK4,PRKAR2B,PTMA,PTPN2,PTPN22,RAI27A,RELA,RFC1,RNF7,RPLOD,S1PR1,SERPIN1,SERPINB2,SET,SHBG,SL1,TIMP3,TP2A,TXN,VEGFA,YWHAZ                                                                                                                          |
| Gene Expression                              | 2.18E-08 | 7.66           | 55      | APP,ARNTL2,ATF2,CID,CAV1,CBX5,CD44,CDK1,CKAP2,DEK,DUSP5,EIF4G2,ELAV1,ETS2,ETV5,FKBP1A,FOSL1,FOXP1,GMNN,HIF1,HDGF,HHEX,HMGB1,HNRNPC,ILF3,LRP8,MATR3,MME,MORF12,MYBL1,NCOA4,NPAS2,NPM1,PEX2,PICALM,PLAG1,POLR3G,PRKAR2B,PSMC3IP,PTMA,RELA,RFC1,S1PR1,SET1,TIMP3,TMPO,TP2A,TRIP13,TROVE2,TXN,VEGFA,WHSC1,WWTR1,YWHAZ,ZNF367                                                                                                                                                                                                                                 |
| Cellular Assembly and Organization           | 1.11E-07 | 6.95           | 10      | BUB1,CENPE,EXO1,MADZ1,NUF2,NUSAP1,RCC1,SKA3,TP2A,ZWINT                                                                                                                                                                                                                                                                                                                                                                                                                                                                                                   |
| Cellular Development                         | 4.35E-07 | 6.36           | 46      | AB12,APP,ATF2,BUB1,CAV1,CD44,CDCA2,CDCA8,CDK1,CDK6,CKS1B,CTNND1,CTSB,DUSP5,ETS2,FBXO9,FKBP5,FOSL1,FOXP1,FUS,GMNN,H2AFZ,HDGF,HMGB1,LDHA,MCM2,MT2A,MYBL1,NPM1,NRP2,NT5C3A,ODCL1,PRKAR2B,PTMA,PTPN2,RELA,RNF7,SERPINB2,SET,SLC7A11,TIMP3,TMEM2,TXN,VEGFA,WHSC1,WWTR1                                                                                                                                                                                                                                                                                        |
| Cancer                                       | 4.54E-07 | 6.34           | 90      | AB12,ALDH1A3,ANLN,ASF1B,ATF2,ATP5G3,BIRC3,BUB1B,BZW1,C8orf59,CASP8AP2,CAV1,CBX5,CD44,CDCA7,CDCA8,CENPE,CKLF,CKS1B,CTSB,DEK,DIAPH1,DUSP5,EIF4G2,ELAV1,ETS2,ETV5,EXO1,EXOC9,FAM83D,FKBP1A,FKBP5,FUS,GMNN,GPR176,HDGF,HIST1H4A,HMGB1,HNRNPDL,HSP61,KNS1R,NR1T1,LDHA,LRP8,MADZ1,MANF,MATR3,MCM2BP,MME,MT1E,MT2A,MYBL1,NCOA4,NEIL3,NPAS2,NPM1,NUF2,NUSAP1,ODCL1,ORC4,PLAG1,PTMA,RAD51AP1,RELA,RFC1,RIF1,RNF182,RPLOD,S100A2,S1PR1,SEI,SET,SLC38A1,SLC7A11,SLC7A5,SNX5,SPDL1,SSX2IP,THUMP3,TIMP3,TM4SF1,TMPO,TM22,TP2A,TRIP13,TXN,TYMB,VEGFA,WHSC1,YWHAZ,ZWINT |
| Cellular Movement                            | 9.77E-07 | 6.01           | 29      | AB12,APP,BCAT1,CAV1,CBX5,CD44,CTNND1,CTSB,DIAPH1,ETS2,ETV5,FKBP1A,FOSL1,FOXP1,HDGF,HHEX,HMGB1,NCOA4,NPM1,NRP2,ODCL1,PICALM,PIP5K1A,RELA,SSX2IP,TIMP3,VEGFA,WHSC1,WWTR1                                                                                                                                                                                                                                                                                                                                                                                   |
| Metabolic Disease                            | 2.54E-06 | 5.60           | 22      | AKAP2,APP,CAV1,CDK1,CTSB,ETS2,HNRNPDL,LARP4,LRP8,MME,NAV3,OPAL,PICALM,PRKAR2B,RCC1,RELA,SET,TIMP3,TMEM2,TXN,WASF1,YWHAZ                                                                                                                                                                                                                                                                                                                                                                                                                                  |
| Reproductive System Development and Function | 3.19E-06 | 5.50           | 4       | BUB1,BUB1B,MADZ1,TRIP13                                                                                                                                                                                                                                                                                                                                                                                                                                                                                                                                  |

90 **Supplementary Figure 6. Differential transcripts recognized by CPEB4 in melanoma versus**  
 91 **pancreatic cancer cells. (a)** Graphical representation of Gene Ontology biological processes (GO  
 92 database 02.10.2015) enriched in the pancreatic cancer cell line RWP1, corresponding to RIP-Seq  
 93 analyses extracted from Ref<sup>3</sup> and graphed with Cytoscape. The diameter of the circle reflects the  
 94 number of GO terms in each of the functional categories. Additional information on the gene  
 95 clusters (numbered from 1 to 91), and the corresponding CPEB4-bound targets per cluster are listed  
 96 in Supplementary Data 3. **(b)** Summary of the functional processes with the highest enrichment in  
 97 the SK-Mel-103 melanoma cells identified by IPA using the CPE-containing transcripts identified by  
 98 RIP-seq as CPEB4 recognized transcripts; see Supplementary Data 4 for additional information.  
 99 Genes validated by RNA Immunoprecipitation and qRT-PCR, as well as by PAT analysis (i.e. to  
 100 demonstrate direct binding and control of poly(A) tail length) are marked in red.

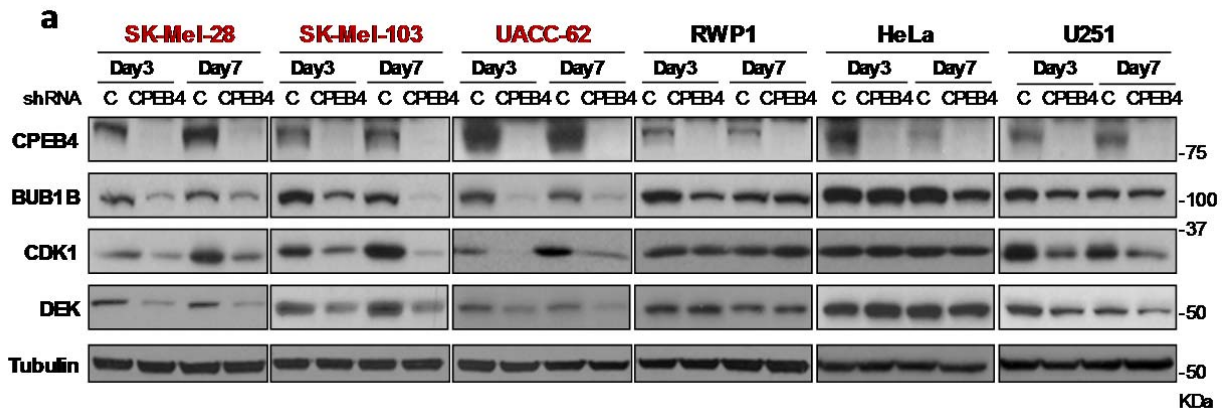

101

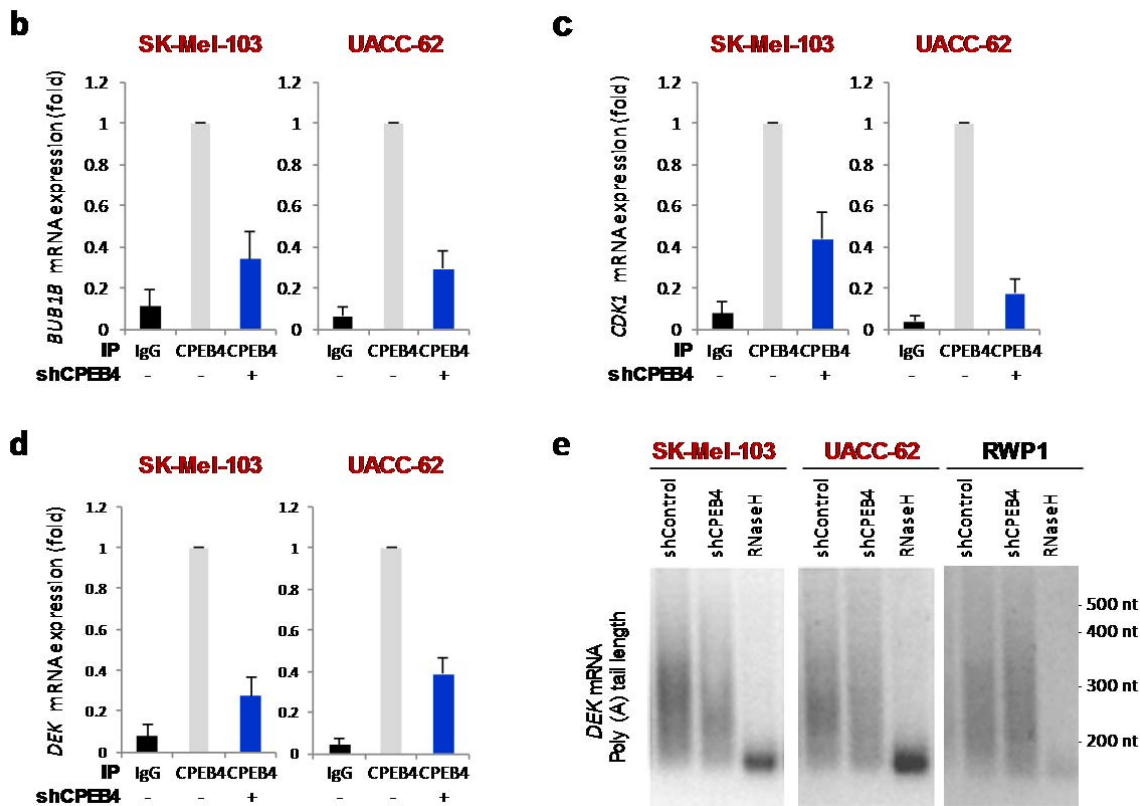

102

103

104 **Supplementary Figure 7. Validation of novel pro-oncogenic signaling hubs as CPEB4 targets in**  
 105 **melanoma. (a)** Immunoblots showing BUB1B, CDK1 and DEK protein downregulation in melanoma  
 106 (red) and non-melanoma (black) cell lines expressing CPEB4 shRNA(1). **(b-d)** *BUB1B* **(b)**, *CDK1* **(c)**  
 107 and *DEK* **(d)** mRNA levels in the immunoprecipitated fraction of parental or shCPEB4 transduced  
 108 cells. Data correspond to quantitative qRT-PCR obtained using RNA fractions crosslinked to CPEB4  
 109 antibody or rabbit IgG. Primers spanning the 3'-UTR regions of the indicated genes are listed in  
 110 Supplementary Methods. mRNA levels were normalized against expression in the inputs (parental  
 111 and shCPEB4-expressing cells) and data are presented as means  $\pm$  SEMs from three independent  
 112 RIP experiments. **(e)** Polyadenylation length test (PAT) of *DEK* 3'UTR in the indicated shControl or  
 113 shCPEB4 transduced cell lines. RNase H was used for poly(A) tail removal to define the specificity of  
 114 the amplification procedure<sup>3</sup>. nt: nucleotides

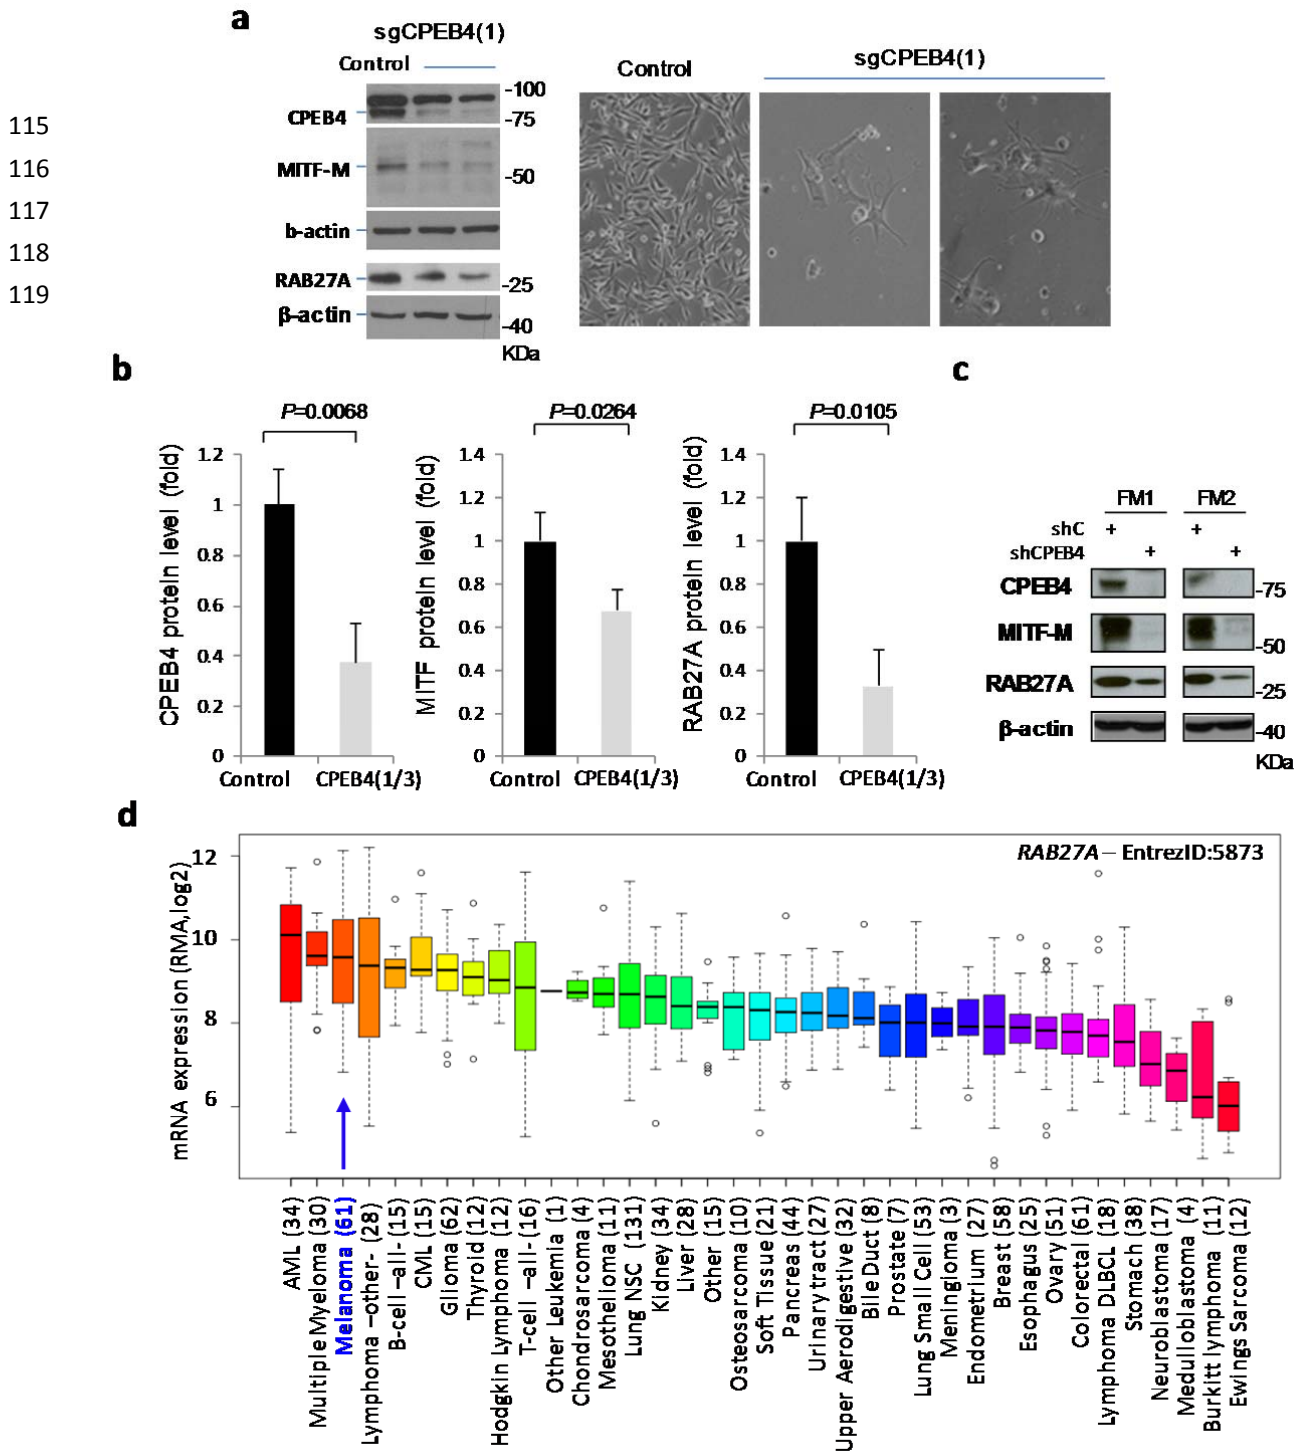

120 **Supplementary Figure 8. Validation of *MITF* and *RAB27A* as a direct *CPEB4* targets using CRISPR-**  
 121 **Cas9 technology.** (a) *CPEB4* depletion by CRISPR-Cas9 genomic editing (gCPEB4-1) in UACC-62 cell  
 122 line. *MITF* and *RAB27A* downregulation is also demonstrated by immunoblot (left panel).  
 123 Representative images of cell clones showing the decrease in cell density by transfection of gCPEB4-  
 124 1 are depicted in right panel. (b) Quantification of *CPEB4*, *MITF* and *RAB27A* protein levels upon  
 125 *CPEB4* depletion from immunoblots as showed in (a). Data is represented as means  $\pm$  SEMs from  
 126 three clones generated using 2 different *CPEB4* guide RNAs (gCPEB4-1/3). (c) Downregulation of  
 127 *MITF* and *RAB27A* in two independent preparations of foreskin melanocytes (FM1 and FM2)  
 128 transduced with shCPEB4 and visualized by immunoblotting. (d) Box plots showing relative *RAB27A*  
 129 mRNA levels across the different tumor types included in the CCLE dataset. The number of cell lines  
 130 of each tumor type analyzed is indicated in parenthesis.



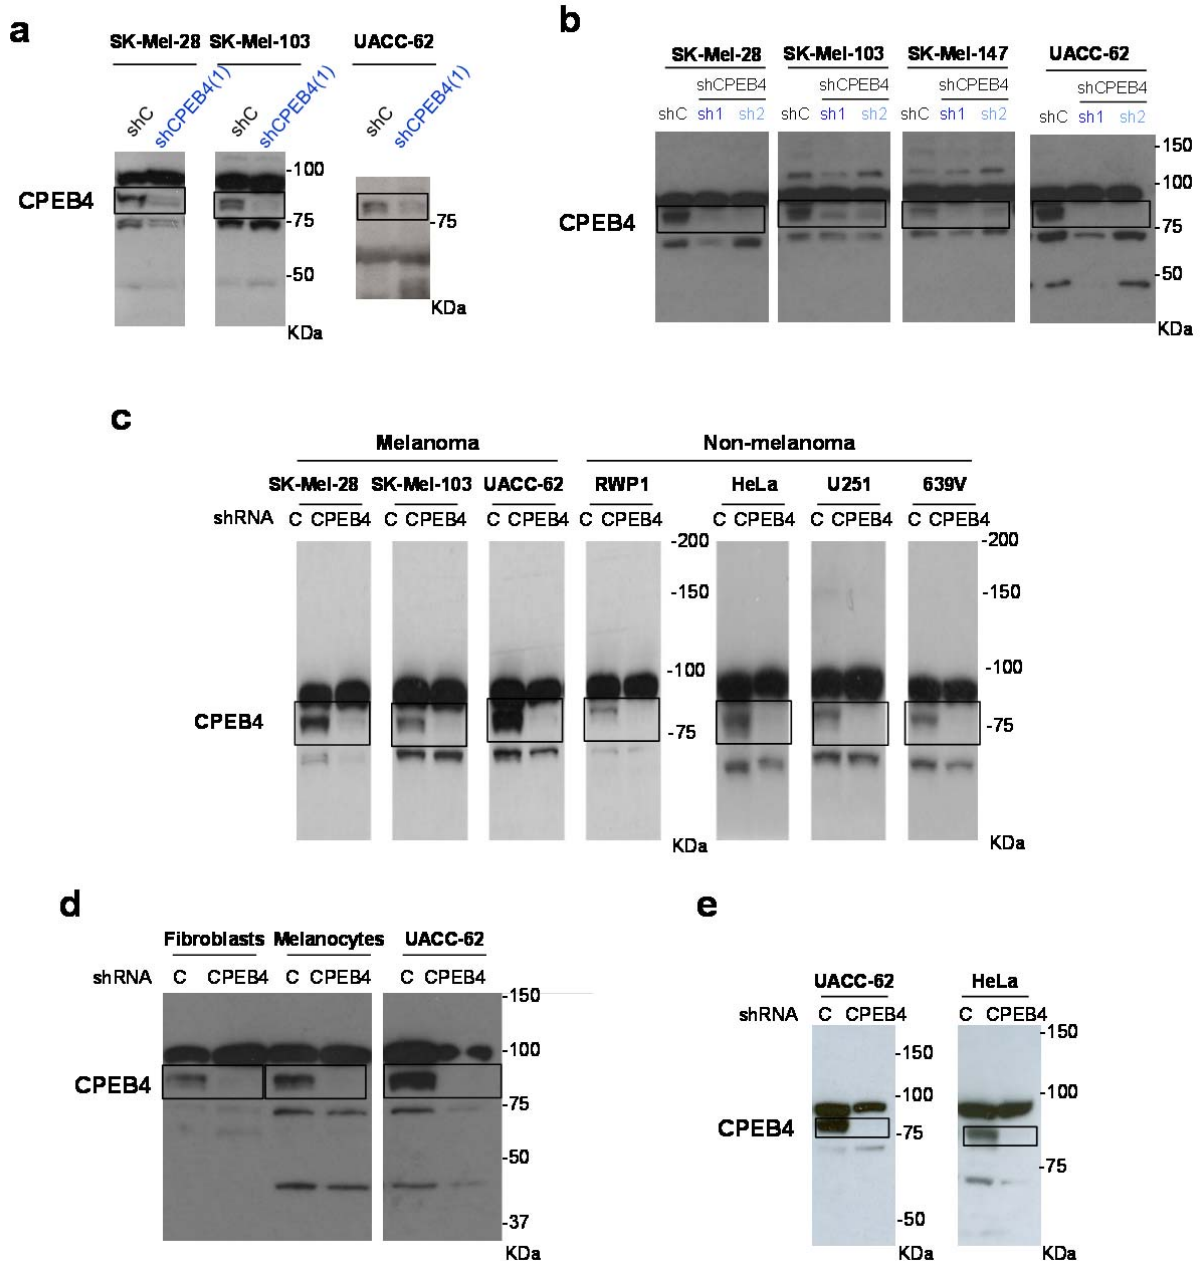

132

133

134 **Supplementary Figure 9.** Uncropped western blot images corresponding to Figure 2a (a), Figure 2c  
 135 (b), Figure 3a (c), Figure 3c (d) and Figure 4e (e).

136

**a**

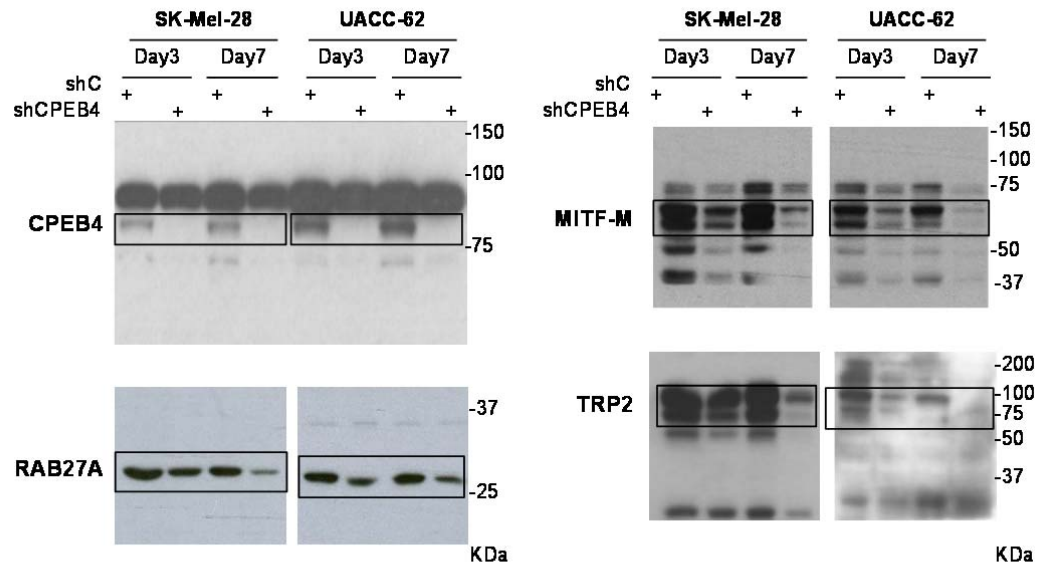

**b**

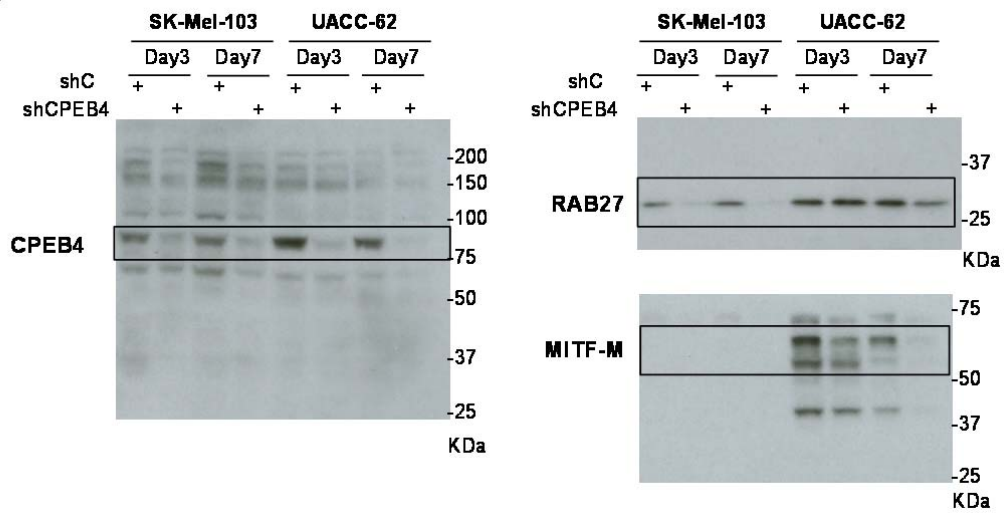

137

138 **Supplementary Figure 10.** Uncropped western blot images corresponding to Figure 8a (a) and  
139 Figure 9a (b).

140

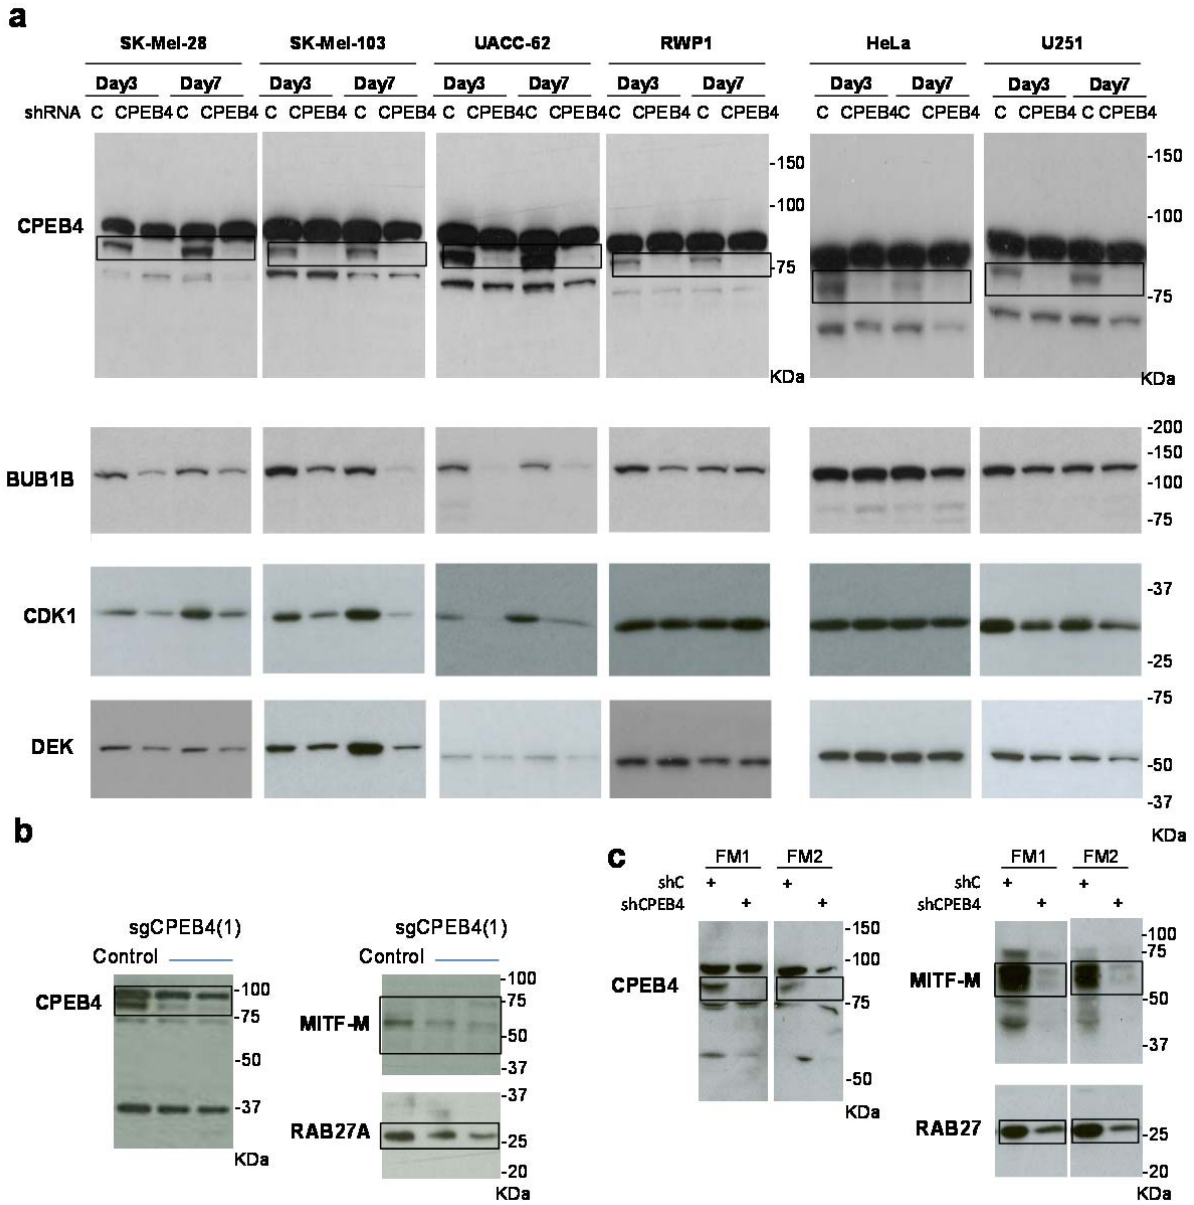

142

143

144

145 **Supplementary Figure 11.** Uncropped western blot images corresponding to Supplementary Figure

146 8a (b) Supplementary Figure 8a (b) and Supplementary Figure 8c (c).

147

148

149

150

151

## 152 **Supplementary Methods**

### 153 ***RNA extraction, RT-qPCR and Oligonucleotides***

154 Total RNA was extracted and purified from cell pellets using RNeasy Mini-Kit (QIAGEN) following the  
155 manufacturer's instructions. 2 µg total RNA was reverse-transcribed into cDNA using the high  
156 capacity cDNA reverse transcriptase kit (Applied Biosystems), according to manufacturer's protocol.  
157 20 ng of the total cDNA were subjected to real-time polymerase chain reaction (qPCR) using Power  
158 SYBR® Green PCR Master Mix (Applied Biosystems). Assays were run in triplicates on the 7900HT  
159 Fast Real-Time PCR system (Applied Biosystems). HPRT was used as loading control to normalized  
160 mRNA expression. For quantitative RT-PCR the primers used were:

161 CPEB4 Fw: TGGGGATCAGCTCTTCATA, CPEB4 Rv: CAATCCGCTACAAACACCT  
162 CPEB1 Fw: CCTGGGTATTAGCCGACAGT, CPEB1 Rv: GCCTCAGCATTTAGCATTCC  
163 HPRT Fw: CCTGGCGTCGTGATTAGTGAT, HPRT Rv: AGACGTTTCAGTCCTGTCCATAA

164 For RIP-qPCR the primers used were:

165 DEK Fw: GCCATGTAAAGAGCATCTGTG, DEK Rv: CAGAAGGCTTTGGATGCATTA  
166 BUB1B Fw: CTCGTGGCAATACAGCTTCA, BUB1B rv: CCAGGCTTTCTGGTGCTTAG  
167 CDK1 Fw: AATGGAAACCAGGAAGCCTAGC, CDK1 Rv: GCCAGAAATTCGTTTGGCTGG  
168 RAB27A Fw: GAAACTGGATAAGCCAGCTACAG, RAB27A Rv: ATATTTCTCTGCGAGTGCTATGG  
169 MITF Fw: GCGCAAAGAAGAACTTGAAAAC, MITF Rv: CGTGGATGGAATAAGGGAAA

170 Primers used for polyadenylation assays were:

171 DEK: CTTGATAGTTACTCAGACACTAGGG  
172 RAB27A: CATGATATAGTGCACACACAAAAGCCACC and MITF: GTCACCTGCTGTTGGATGCAGC  
173

### 174 ***Gene silencing by CRISPR-Cas9 technology***

175 CPEB4 gene were silenced by CRISPR-Cas9 technology. To this end, Zhang Lab platform  
176 (<http://crispr.mit.edu/>) was used to design guide sgRNA sequences targeting the first exon common  
177 to all CPEB4 isoforms. Oligonucleotides used were: CPEB4\_01\_Fw:  
178 CACCGAGCTGGGGCGAGCATACTTC; CPEB4\_01\_Rv: AAACGAAGTATGCTCGCCCCAGCTC;  
179 CPEB4\_02\_Fw: CACCGCCGTTATTAGCCGAAGCAGC; CPEB4\_02\_Rv:  
180 AAACGCTGCTTCGGCTAATAACGGC; CPEB4\_03\_Fw: CACCGCCGTTATTAGCCGAAGCAGC;  
181 CPEB4\_03\_Rv: AAACGCTGCTTCGGCTAATAACGGC. Briefly, oligonucleotides were phosphorylated,  
182 annealed and ligated into pSpCas9(BB)-2A-Puro (PX459) V2.0 vector (Addgene, 62988). UACC-62  
183 cells were transfected with 2 µg of each construct using Lipofectamine 3000 (Invitrogen) following  
184 manufacturer's instructions. After 24 hr, cells were selected with puromycin (1µg/mL) for 2 days  
185 and gene silencing efficiency was determined by immunoblotting. This strategy identified sgCPEB(1)  
186 and (3) with depleting activities.

187 ***SA- $\beta$ -galactosidase assay***

188  $\beta$ -galactosidase staining at acidic pH was performed as previously described<sup>4</sup>. Briefly, 6 days after  
189 infection with lentiviral vectors expressing control or CPEB4 shRNAs, melanoma cells were washed  
190 twice with phosphate-buffered saline (PBS; pH 7.2), fixed with 0.5% glutaraldehyde in PBS and  
191 washed in PBS supplemented with 1 mM MgCl<sub>2</sub>. Cells were stained at 37°C in X-Gal solution (1  
192 mg/ml X-Gal (Promega), 0.12 mM K<sub>3</sub>Fe[CN]<sub>6</sub>, 0.12 mM K<sub>4</sub>Fe[CN]<sub>6</sub>, 1 mM MgCl<sub>2</sub> in PBS at pH 6.0). The  
193 staining was performed for 4–6 h to minimize the background signal. Experiments were repeated at  
194 least twice in triplicates.

195 ***Tissue Immunohistochemistry and immunofluorescence***

196 For CPEB4 detection in benign vs malignant melanocytic lesions by immunohistochemistry, a total  
197 of 56 paraffin embedded tissue samples including common melanocytic dermal nevi (N=21),  
198 primary vertical growth phase melanoma (N=10), skin (N=14) and lymph node (N=11) melanoma  
199 metastases were stained with mouse monoclonal antibody against CPEB4 diluted 1:2000 (clone  
200 ERE93C, generated by Monoclonal Antibodies Unit from CNIO) and were analyzed on whole tissue-  
201 sections. Samples were processed using Bond™ Automated System (Leica Microsystems) by  
202 Monoclonal Antibodies Unit from CNIO. After automated dewaxing and rehydration of the paraffin  
203 embedded sections, heat-induced antigen retrieval was performed using Bond Epitope Retrieval  
204 Solution 2 (Leica Biosystems) and immunodetection was performed with Bond™ Polymer Refine  
205 Detection (Leica Microsystems) following the manufacturer's instructions. CPEB4 protein  
206 expression was scored blinded according to staining intensity and total positive area by two  
207 independent dermatologists. The score system used for staining intensity was: 0 (no detectable), 1  
208 (weak), 2 (intermediate) or 3 (high intensity). Similar analyses were performed in tissue microarrays  
209 (TMAs) for comparative evaluation of CPEB4 across tumor types (melanoma (N=25), bladder (N=2),  
210 breast (N=6), colorectal (N=6), endometrium (N=5), genital (N=3), linfoma (N=6), liver (N=3), lung  
211 (N=5), osteosarcoma (N=3), ovary (N=13), pancreas (N=8), thyroid (N=2), non-melanoma skin  
212 (N=15) and soft-tissue (N=6) cancers; a total of N=108 specimens).

213 Additional stainings were performed in paraffin-embedded human skin metastasis or mice  
214 xenografts with antibodies against CPEB4 (ERE93C; dilution1:50), RAB27A (HPA001333, Sigma;  
215 dilution1:50), MITF (Ab-1, Clone C5, Thermo Scientific; dilution1:400),  $\alpha$ -Tubulin (mouse; clone  
216 DM1A, Sigma; dilution1:500) and phospho-Histone 3 (rabbit; 06-570, Millipore; dilution1:500).  
217 Antigen retrieval was performed using 10 mmol/L sodium citrate buffer at pH 6. Digital images of  
218 IHC-stained sections were obtained at 40x magnification (0.12 $\mu$ m/ pixel) using a whole slide



219 scanner (Mirax scan, Zeiss) fitted with a 40x/0.95 Plan Aplanachromat objective lens (Zeiss). For  
220 immunohistochemical detection, nuclei were counterstained with hematoxylin.

221 For fluorescence-based analyses, secondary antibodies used were anti-mouse Alexa Fluor 555 and  
222 anti-rabbit Alexa Fluor 488 (Life Technologies; dilution 1:400) and DNA was counterstained with  
223 DAPI. Negative controls were obtained by omitting the primary antibody. Image mosaics were  
224 acquired at 20xHCX PL APO 0.7 N.A. dry objective using a confocal TCS-SP5 (AOBS-UV) confocal  
225 microscope. For high-throughput confocal analyses of double IF stainings of CPEB4 and RAB27A in  
226 whole-tissue sections, image acquisition was performed using “matrix screening remote control”  
227 (MSRC)<sup>5</sup>, a new tool for intelligent screening, developed at the CNIO, which improves the quality  
228 and speed of image acquisition. In brief, the MSRC tool manages a first fast scan with low-  
229 resolution settings to generate one image per slide. This first image is subsequently analyzed by the  
230 MSRC software to localize and extract the coordinates of the regions of interest (i.e. tissue samples  
231 within the slide). With this spatial information, the MSRC application interacts with the microscope  
232 and loads high-resolution settings to scan automatically the areas of interest. After image  
233 acquisition, analysis was performed by Definiens XD software, first identifying single cells within  
234 every tissue and, then, measuring the fluorescence intensities of green (RAB27A) and red (CPEB4)  
235 staining per cell. Similarly, RAB27A and MITF relative expression per tumor was calculated as the  
236 product of total positive area and mean intensity of the staining from positive areas.

### 237 **Supplementary references**

- 238 1. Ramaswamy, S. *et al.* Multiclass cancer diagnosis using tumor gene expression signatures. *Proc Natl*  
239 *Acad Sci U S A* **98**, 15149-15154 (2001).
- 240 2. Wagner, K.W. *et al.* Death-receptor O-glycosylation controls tumor-cell sensitivity to the  
241 proapoptotic ligand Apo2L/TRAIL. *Nat Med* **13**, 1070-1077 (2007).
- 242 3. Ortiz-Zapater, E. *et al.* Key contribution of CPEB4-mediated translational control to cancer  
243 progression. *Nat Med* **18**, 83-90 (2012).
- 244 4. Denoyelle, C. *et al.* Anti-oncogenic role of the endoplasmic reticulum differentially activated by  
245 mutations in the MAPK pathway. *Nat Cell Biol* **8**, 1053-1063 (2006).
- 246 5. Carro, A., Perez-Martinez, M., Soriano, J., Pisano, D.G. & Megias, D. iMSRC: converting a standard  
247 automated microscope into an intelligent screening platform. *Sci Rep* **5**, 10502 (2015).

248  
249
